# Supplementary material for: Nanogold supported on manganese oxide doped alumina microspheres as a highly active and selective catalyst for CO oxidation in a H2-rich stream
Source: Royal Society of Chemistry journal article supplement (doi:10.1039/c5cc06480e), 2015-01-01
Supplement: c5cc06480e1.pdf [file c5cc06480e1.pdf]

## Supporting Information

### **Nanogold supported on manganese oxide doped alumina microspheres as a highly active and selective catalyst for CO oxidation in a H<sub>2</sub>-rich stream**

**Yu-Xin Miao, Wen-Cui Li, Qiang Sun, Lei Shi, Lei He, Jing Wang, Gao-Ming Deng and An-Hui Lu\***

State Key Laboratory of Fine Chemicals, School of Chemical Engineering,  
Dalian University of Technology, Dalian 116024, P. R. China

*† Electronic Supplementary Information (ESI) available: Details of catalyst preparation, reaction measurements and tests, as well as characterization data of XRD, Raman, BET, EDX, TEM, HAADF-STEM, XPS, CO-DRIFTS and H<sub>2</sub>-TPR. See DOI: 10.1039/b000000x/*

\* Corresponding author: (+) 86-411-84986112, E-mail: anhuilu@dlut.edu.cn

## **1. Catalyst preparation**

### **1.1 Synthesis of MnO<sub>2</sub>-Al<sub>2</sub>O<sub>3</sub> support**

All the chemicals used in the current work were of analytical grade without further purification. The  $\gamma$ -Al<sub>2</sub>O<sub>3</sub> support was prepared using a hydrothermal method we reported previously.<sup>1</sup> Manganese doped  $\gamma$ -Al<sub>2</sub>O<sub>3</sub> support was prepared by a redox method. Typically, 0.09 g  $\gamma$ -Al<sub>2</sub>O<sub>3</sub> and 0.865 g KMnO<sub>4</sub> were dissolved in 5 ml of deionized water under vigorous stirring at 25 °C, Then 125  $\mu$ l of glycol was added and the mixture was stirred continuously at 25 °C for 0.5 h. Afterward, the precipitate was washed, dried, and calcined in muffle oven at 200 °C for 2 h in order to obtain the MnO<sub>2</sub>-Al<sub>2</sub>O<sub>3</sub> supports (denoted as **MnAl**). For comparison purpose, the pure MnO<sub>2</sub> was made by a redox method following the above procedure, which was not adding the  $\gamma$ -Al<sub>2</sub>O<sub>3</sub> at first.

### **1.2 Synthesis of Au/MnO<sub>2</sub>-Al<sub>2</sub>O<sub>3</sub> catalyst**

All the supported Au catalysts were prepared by a deposition-precipitation (DP)

method as described elsewhere.<sup>2,3</sup> In a typical preparation, The required amount of HAuCl<sub>4</sub> solution (7.888 g/L) was added into an aqueous suspension of supports ( $\gamma$ -Al<sub>2</sub>O<sub>3</sub>, MnO<sub>2</sub>-Al<sub>2</sub>O<sub>3</sub> and MnO<sub>2</sub>) and the pH value was adjusted to about 8 by dropwise addition of (NH<sub>4</sub>)<sub>2</sub>CO<sub>3</sub> (0.5 M) solution. Then, the mixture was aged at 60 °C for 2 h. After centrifugation, washing with deionized water for 4 times and drying under vacuum, the Au catalyst was obtained. The Au loading for each catalyst was 1 wt.%. These samples are denoted as **Au/Al**, **Au/MnAl**, and **Au/Mn**, respectively. For comparison, the 3 wt.% Au catalyst was made by the DP method, denoted as **3Au/Al**, **3Au/MnAl**, and **3Au/Mn**. For the preparation of Au/MnO<sub>2</sub>-CeO<sub>2</sub> and Au/MnO<sub>2</sub>-Al<sub>2</sub>O<sub>3</sub> catalysts, the similar processes were used, but replacing Al<sub>2</sub>O<sub>3</sub> (microspheres structures) with home-made CeO<sub>2</sub><sup>4</sup> or Al<sub>2</sub>O<sub>3</sub><sup>3</sup> (denoted as **3Au/Ce-cube**, **3Au/MnCe-cube**, **3Au/Al-sheet**, and **3Au/MnAl-sheet**).

## 2. Catalyst tests

The catalysts were heated at 250 °C for 2 h in a muffle oven, and then their activities for CO oxidation were evaluated in a fixed-bed quartz reactor (8 mm i.d.) at atmospheric pressure. The feed gases were consisted of 1 vol.% CO, 1 vol.% O<sub>2</sub>, 40 vol.% H<sub>2</sub> (balanced with N<sub>2</sub>) and were allowed to pass through 100 mg of catalyst at a flow rate of 67 mL/min (corresponding space velocity was 40,000 mL/h·g<sub>cat</sub>). The effluent gas compositions were analyzed with an on-line gas chromatograph (Tianmei GC-7890) equipped with a TCD detector and a 5A molecular sieve column. The temperature range of catalyst tests was from 30 to 150 °C, where the water gas shift (WGS) reaction is negligible. The conversion and the selectivity of CO were estimated according to the following equation:

$$X_{CO} (\%) = \frac{[CO]_n - [CO]_{out}}{[CO]_n} \times 100\%$$

$$X_{O_2} (\%) = \frac{[O_2]_n - [O_2]_{out}}{[O_2]_n} \times 100\%$$

$$S_{CO_2} (\%) = \frac{0.5 \times \{[CO]_n - [CO]_{out}\}}{[O_2]_n - [O_2]_{out}} \times 100\%$$

Where  $X$  and  $S$  are the conversion of CO or O<sub>2</sub> and the selectivity of O<sub>2</sub> to oxidize CO, respectively.

### 3. Catalyst characterization

The actual loadings of gold and manganese were determined by inductively coupled plasma atomic emission spectroscopy (ICP-AES) on the Optima 2000 DV. Powder X-ray diffraction (XRD) patterns were recorded using a Rigaku D/MAX-2400 diffractometer (Cu K $\alpha$  radiation,  $\lambda = 1.54056 \text{ \AA}$ ). The nitrogen adsorption measurements were performed on a Micromeritics Tristar 3000 instrument at -196 °C. Raman spectra were recorded with a Thermo DXR Raman Microscope using a laser excitation wavelength of 532 nm. The morphologies of MnAl support was carried out with a FEI Quanta 450 scanning electron microscope (SEM). Scanning transmission electron microscopy (STEM) and energy-dispersive X-ray (EDX) were carried out using a FEI Tecnai F30 electron microscope at an accelerating voltage of 300 kV. Hydrogen temperature-programmed reduction (H<sub>2</sub>-TPR) experiments were measured by a Micromeritics Autochem II 2920 instrument equipped with a thermal conductivity detector (TCD). The catalyst was pretreated in Ar flow at 150 °C for 30 min. After that, the catalyst was heated from 40 °C to 800 °C (10 °C/min) in 8 vol.% H<sub>2</sub>/Ar mixed gas flows. *In situ* diffuse reflectance FTIR spectra (DRIFTS) were collected using a Nicolet 6700 FT-IR spectrometer equipped with a MCT detector. The X-ray photoelectron spectroscopy (XPS) measurements were performed on a Thermo VG ESCALAB 250 spectrometer with contaminated C 1s peak as internal standard (284.6 eV).

## 4. Supporting results

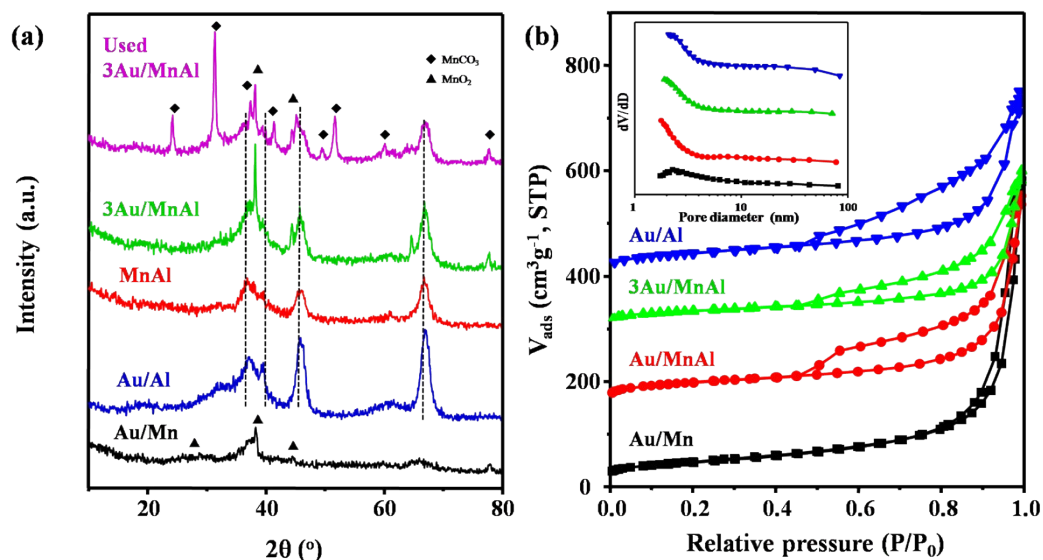

Fig. S1 (a) XRD patterns of different catalysts, (b) Nitrogen sorption isotherms of the catalysts (inset are the corresponding pore size distribution curves). The isotherms of Au/MnAl, 3Au/MnAl and Au/Al were offset vertically by 150, 300 and 400  $\text{cm}^3\text{g}^{-1}$ , STP, respectively.

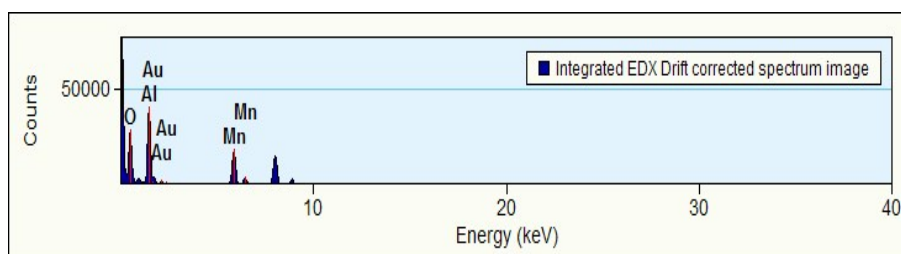

Fig. S2 The EDX patterns of the 3Au/MnAl catalyst based on the selected area shown in Fig. 1e.

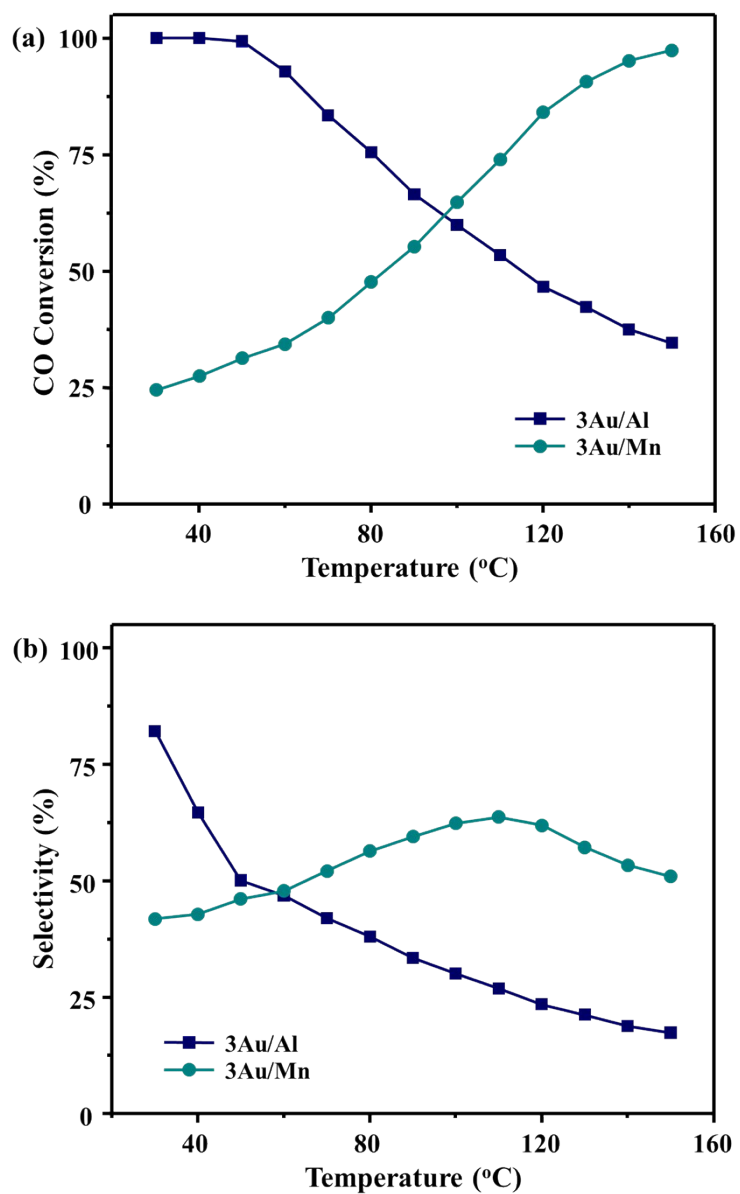

Fig. S3 (a) Conversion and (b) selectivity as a function of reaction temperatures for CO-PROX of 3Au/Al and 3Au/Mn catalysts. Reaction conditions: 1 vol.% CO + 1 vol.% O<sub>2</sub> + 40 vol.% H<sub>2</sub> and balance N<sub>2</sub>. Weight hourly space velocity (WHSV) = 40,000 mL/h·g<sub>cat</sub>.

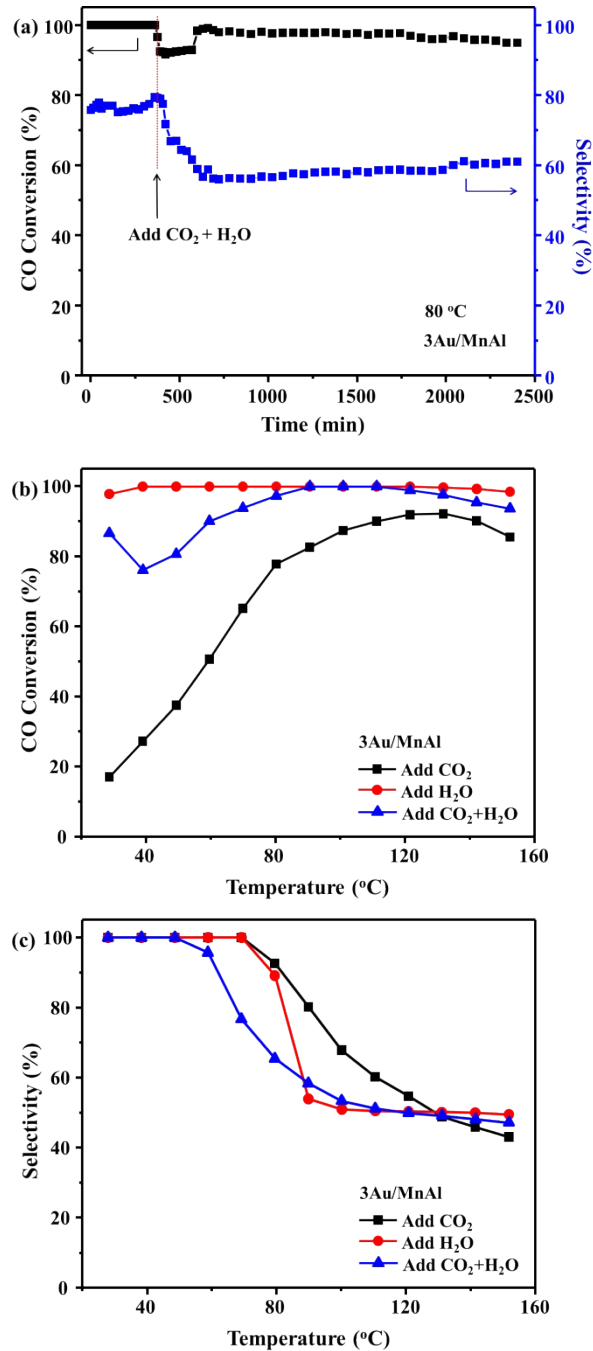

Fig. S4 (a) Stability test of 3Au/MnAl catalyst with a time-on-stream at 80 °C. (b) Conversion and (c) selectivity as a function of reaction temperatures for CO-PROX of 3Au/MnAl catalyst. Reaction conditions: 1 vol.% CO + 1 vol.% O<sub>2</sub> + 40 vol.% H<sub>2</sub> + (10 vol.% H<sub>2</sub>O, 20 vol.% CO<sub>2</sub>, and 10 vol.% H<sub>2</sub>O + 20 vol.% CO<sub>2</sub>), and balance N<sub>2</sub>. WHSV = 40,000 mL/h·g<sub>cat</sub>.

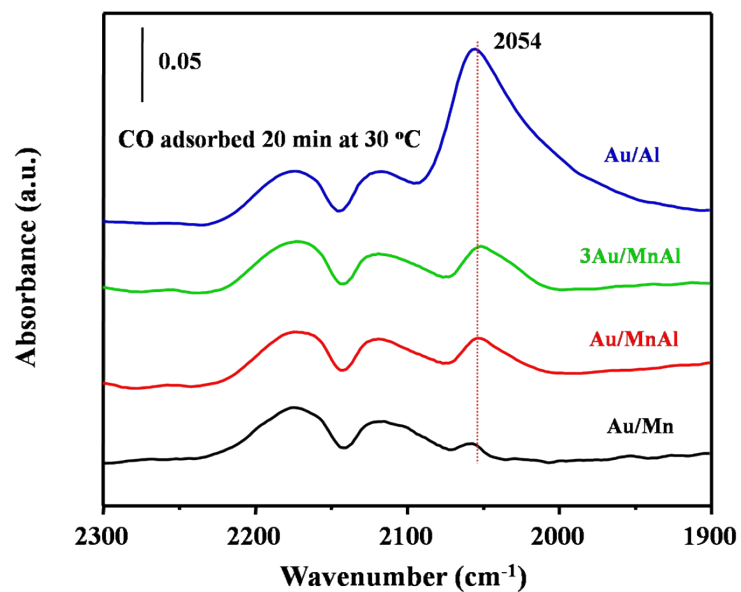

Fig. S5 DRIFTS spectra of CO adsorption on different catalysts at 30 °C.

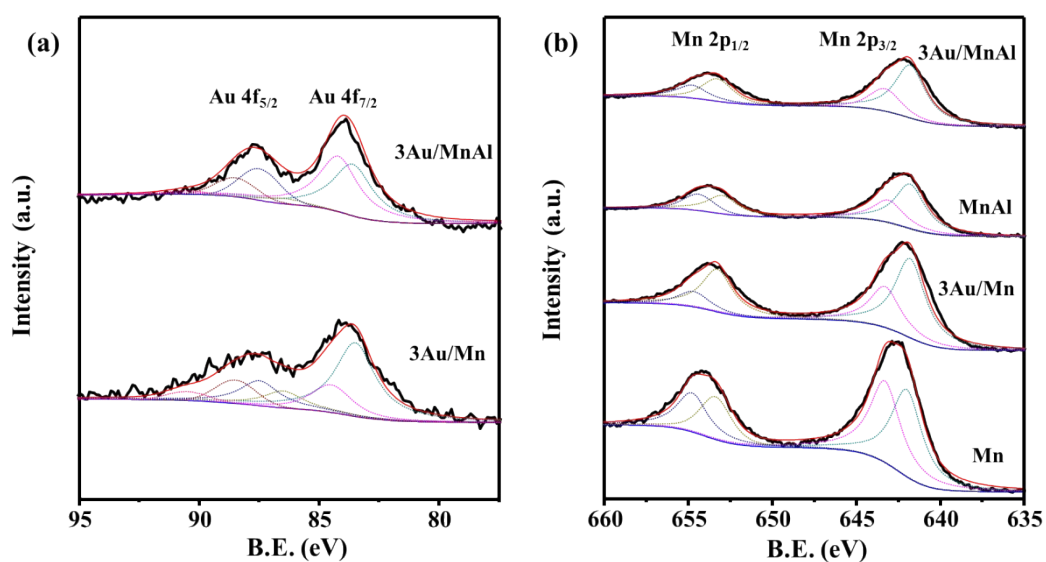

Fig. S6 XPS spectra of different catalysts (a) Au 4f, (b) Mn 2p.

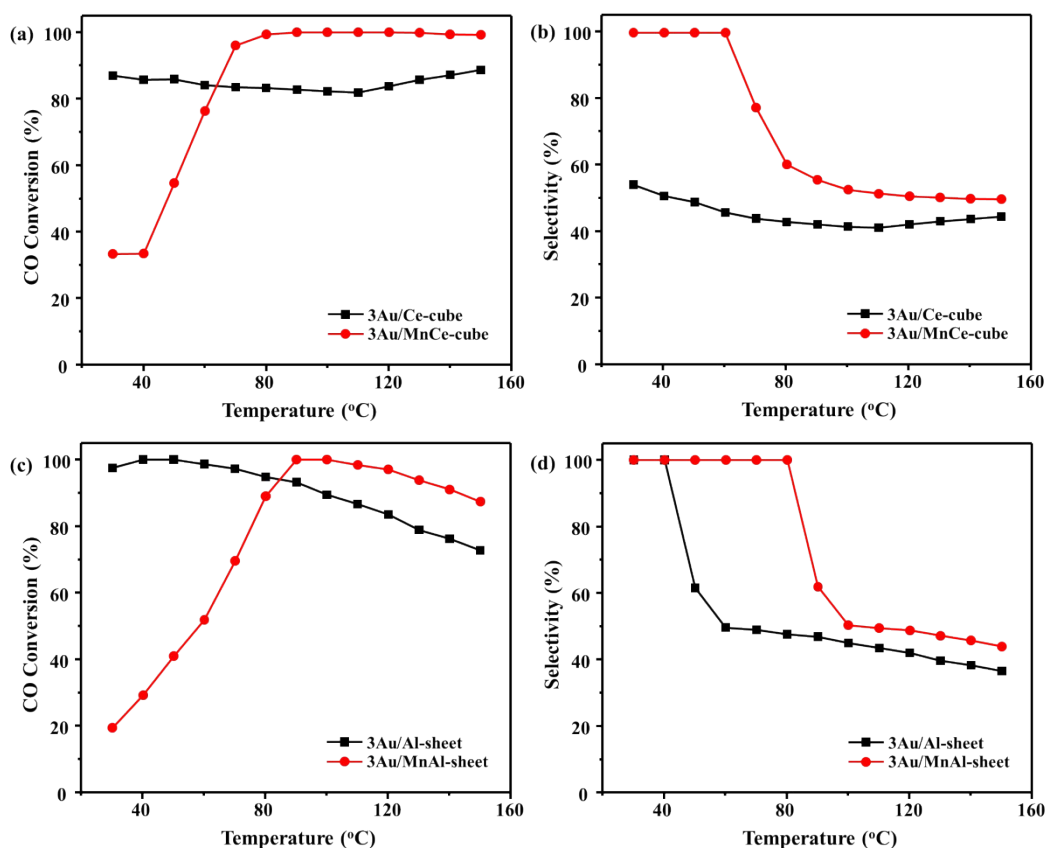

Fig. S7 (a, c) Conversion and (b, d) selectivity as a function of reaction temperatures for CO-PROX of different Au catalysts. Reaction conditions: 1 vol.% CO + 1 vol.% O<sub>2</sub> + 40 vol.% H<sub>2</sub> and balance N<sub>2</sub>. Weight hourly space velocity (WHSV) = 40,000 mL/h·g<sub>cat</sub>.

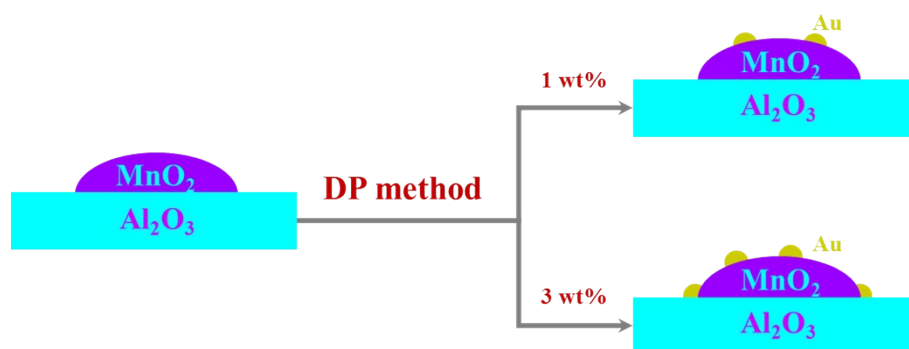

Scheme S1. Evolution of the structure of the prepared catalyst after precipitation gold. (Left) Starting MnAl support after calcined; (Right Top) after deposition-precipitation (DP) 1wt% Au; (Right Bottom) after DP 3wt% Au.



Table S1. Physicochemical properties of the synthesized Au catalysts

| catalyst | Au loading<br>(wt.%) <sup>a</sup> | Mn loading<br>(wt.%) <sup>a</sup> | S <sub>BET</sub><br>(m <sup>2</sup> /g) <sup>b</sup> | V <sub>total</sub><br>(cm <sup>3</sup> /g) <sup>b</sup> |
|----------|-----------------------------------|-----------------------------------|------------------------------------------------------|---------------------------------------------------------|
| Au/Al    | 0.92                              | 0                                 | 160                                                  | 0.54                                                    |
| Au/Mn    | 1.2                               | -                                 | 168                                                  | 0.90                                                    |
| Au/MnAl  | 1.3                               | 23.9                              | 167                                                  | 0.62                                                    |
| 3Au/Al   | 3.0                               | 0                                 | 151                                                  | 0.64                                                    |
| 3Au/Mn   | 3.1                               | -                                 | 169                                                  | 1.13                                                    |
| 3Au/MnAl | 3.1                               | 18.1                              | 120                                                  | 0.46                                                    |

<sup>a</sup> The actual loadings of Au and Mn were determined by an ICP technique.

<sup>b</sup> S<sub>BET</sub> = specific surface area calculated by the Brunauer-Emmett-Teller (BET) method, V<sub>total</sub> = total pore volumes at P/P<sub>0</sub> = 0.99.

Table S2. A catalytic performance comparison list of the Au catalysts

| catalysts                                                   | Au loading<br>(wt.%) | feed gas (vol.%)<br>WHSV (mL/h·g <sub>cat</sub> )                      | Temperature<br>of X <sub>max</sub><br>(°C) | 80 °C<br>X <sub>CO</sub><br>(%) | 80 °C<br>S<br>(%) | Ref       |
|-------------------------------------------------------------|----------------------|------------------------------------------------------------------------|--------------------------------------------|---------------------------------|-------------------|-----------|
| Au/Al                                                       | 0.92                 |                                                                        | 30-50                                      | 80                              | 40                | This work |
| Au/Mn                                                       | 1.2                  | 1% CO, 1% O <sub>2</sub><br>40% H <sub>2</sub> , 58% N <sub>2</sub>    | 150                                        | 45                              | 100               | This work |
| Au/MnAl                                                     | 1.3                  | 40,000                                                                 | 130                                        | 36                              | 100               | This work |
| 3Au/MnAl                                                    | 3.1                  |                                                                        | 80-120                                     | 100                             | 80                | This work |
| Au/MnO <sub>2</sub> -TiO <sub>2</sub>                       | 0.58                 | 1.33% CO, 1.33% O <sub>2</sub><br>65.33% H <sub>2</sub> , He<br>30,000 | 80                                         | 98                              | 51                | 5         |
| Au/MnO <sub>2</sub> -CeO <sub>2</sub>                       | 1.0                  | 1.33% CO, 1.33% O <sub>2</sub><br>65.33% H <sub>2</sub> , He<br>30,000 | 80                                         | 98                              | 49                | 6         |
| Au/MnO <sub>x</sub> -CeO <sub>2</sub><br>(Mn/Ce=1:1)        | 1.0                  | 1.5% CO, 1.5% O <sub>2</sub><br>50% H <sub>2</sub> , He<br>12,000      | 120                                        | 55                              | 45                | 7         |
| Au/MnO <sub>x</sub> -CeO <sub>2</sub><br>(M=Mn, Fe, Co, Ni) | 2.5                  | 1.5% CO, 1.5% O <sub>2</sub><br>50% H <sub>2</sub> , He<br>12,000      | 120                                        | 73                              | 41                | 8         |
| Au/CeO <sub>2</sub> -Co <sub>3</sub> O <sub>4</sub>         | 1.0                  | 1% CO, 1% O <sub>2</sub><br>50% H <sub>2</sub> , Ar<br>30,000          | 80                                         | 94                              | 52                | 9         |
| Au/CeO <sub>2</sub> -Fe <sub>2</sub> O <sub>3</sub>         | 3.5                  | 1% CO, 1.25% O <sub>2</sub><br>50% H <sub>2</sub> , He <sup>a</sup>    | 80                                         | 100                             | 40                | 10        |

|                                                                                                        |         |                                                                                                                        |         |     |    |    |
|--------------------------------------------------------------------------------------------------------|---------|------------------------------------------------------------------------------------------------------------------------|---------|-----|----|----|
| Au/HMS-M<br>(M = Fe/Ce/Ti)                                                                             | 2.84    | 0.5% CO, 1% O <sub>2</sub><br>50% H <sub>2</sub> , 48.5% N <sub>2</sub> <sup>b</sup><br>1.33% CO, 1.33% O <sub>2</sub> | 130-170 | 50  | 60 | 11 |
| Au/ZnO-TiO <sub>2</sub>                                                                                | ca. 0.7 | 65.33% H <sub>2</sub> , He<br>30,000<br>2% CO, 1% O <sub>2</sub>                                                       | 50-80   | 100 | 50 | 12 |
| Au/CeO <sub>2</sub> -M<br>(M = Zr/Zn/Fe)                                                               | 1.0     | 50% H <sub>2</sub> , Ar<br>30,000                                                                                      | 70      | 75  | 68 | 13 |
| Au/CeO <sub>2</sub> -MO <sub>x</sub> /Al <sub>2</sub> O <sub>3</sub><br>(M = La, Ni, Cu, Fe,<br>Cr, Y) | 2.0     | 1% CO, 1.5% O <sub>2</sub><br>50% H <sub>2</sub> , He<br>12,000-60,000<br>2% CO, 1% O <sub>2</sub>                     | 80      | 93  | 65 | 14 |
| Au/MnO <sub>x</sub> /MgO/<br>Al <sub>2</sub> O <sub>3</sub>                                            | 5.0     | 4% H <sub>2</sub> , He<br>12,000                                                                                       | 50      | 90  | 47 | 15 |

<sup>a</sup> W/F = 0.03 g·s/cm<sup>3</sup>.

<sup>b</sup> The molar flow rate of the CO in this gas mixture was  $3.72 \times 10^{-7}$  mol s<sup>-1</sup>.

## 5. References:

- J. Wang, Z.-H. Hu, Y.-X. Miao, W.-C. Li, *Gold Bull.*, 2014, **47**, 95.
- Y.-X. Miao, L. Shi, Li.-Na. Cai, W.-C. Li, *Gold Bull.*, 2014, **47**, 275.
- J. Wang, A.-H. Lu, M. Li, W. Zhang, Y.-S. Chen, D.-X. Tian, and W.-C. Li, *ACS Nano*, 2013, **7**, 4902.
- K. Jia, H. Zhang, W. Li, *Chin. J. Catal.*, 2008, **29**, 1089.
- L.-H. Chang, N. Sasirekha, Y.-W. Chen, *Catal. Commun.*, 2007, **8**, 1702.
- L.-H. Chang, N. Sasirekha, Y.-W. Chen, W.-J. Wang, *Ind. Eng. Chem. Res.*, 2006, **45**, 4927.
- M. Meng, Y. Tu, T. Ding, Z. Sun, L. Zhang, *Int. J. Hydrogen Energy*, 2011, **36**, 9139.
- Y.-B. Tu, J.-Y. Luo, M. Meng, G. Wang, J.-J. He, *Int. J. Hydrogen Energy*, 2009, **34**, 3743.
- H. Wang, H. Zhu, Z. Qin, F. Liang, G. Wang, J. Wang, *J. Catal.*, 2009, **264**, 154.
- T. Tabakova, G. Avgouropoulos, J. Papavasiliou, M. Manzoli, F. Boccuzzi, K. Tenchev, F. Vindigni, T. Ioannides, *Appl. Catal. B*, 2011, **101**, 256.
- T. A. Zepeda, A. Martinez-Hernández, R. Guil-López, B. Pawelec, *Appl. Catal. B*, 2010, **100**, 450.
- Y.-W. Chen, D.-S. Lee, H.-J. Chen, *Int. J. Hydrogen Energy*, 2012, **37**, 15140.
- O. H. Laguna, F. Romero Sarria, M. A. Centeno, J. A. Odriozola, *J. Catal.*, 2010, **276**, 360.
- T. R. Reina, S. Ivanova, M. A. Centeno, J. A. Odriozola, *Int. J. Hydrogen Energy*, 2015, **40**, 1782.
- R. J. H. Grisel, C. J. Weststrate, A. Goossens, M. W. J. Crajé, A. M. Van der Kraan, B. E. Nieuwenhuys, *Catal Today*, 2002, **72**, 123.
